# Supplementary material for: High-Nitrate-Supply-Induced Transcriptional Upregulation of Ascorbic Acid Biosynthetic and Recycling Pathways in Cucumber
Source: MDPI journal article supplement (doi:10.3390/plants12061292), 2023-03-13
Supplement: s1 [file s1]

## Supplementary data.

### High nitrate supply induced transcriptional upregulation of ascorbic acid biosynthetic and recycling pathways in cucumber

Neda Hesari, Anita Szegő, Iman Mirmazloum, Zsolt Pónya, Erzsébet Kiss-Bába, Henriett Kolozs, Márta Gyöngyik, Dominika Vasas, István Papp

**Table S1.** Different concentrations of potassium nitrate in fertigation solutions

|                                  | Standard<br>4 mM | High<br>20 mM | Extreme<br>50 mM |
|----------------------------------|------------------|---------------|------------------|
| KNO <sub>3</sub>                 |                  |               |                  |
| MgSO <sub>4</sub>                |                  | <0.5 mM>      |                  |
| NaFe-EDTA                        |                  | <5 µM>        |                  |
| KH <sub>2</sub> PO <sub>4</sub>  |                  | <1 mM>        |                  |
| H <sub>3</sub> BO <sub>3</sub>   |                  | <0.2 µM>      |                  |
| Na <sub>2</sub> MoO <sub>4</sub> |                  | <10.0 µM>     |                  |
| ZnSO <sub>4</sub>                |                  | <1.0 µM>      |                  |
| MnCl <sub>2</sub>                |                  | <2.0 µM>      |                  |
| CuSO <sub>4</sub>                |                  | <0.5 µM>      |                  |
| CoCl <sub>2</sub>                |                  | <0.2 µM>      |                  |
| NiSO <sub>4</sub>                |                  | <0.2 µM>      |                  |

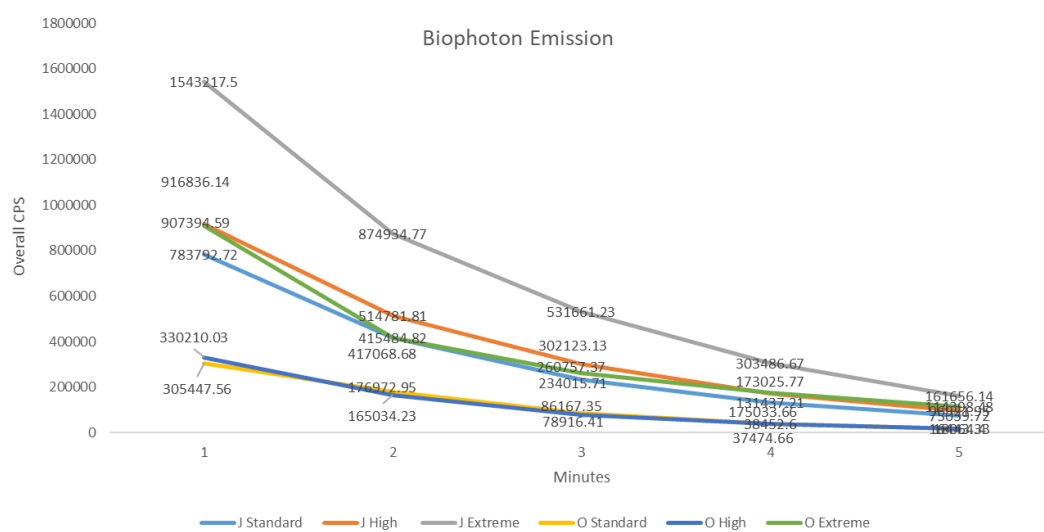

**Figure S1.** Overall photon count per second of 'Oitol' and 'Joker' cucumber leaves treated with different levels of nitrate concentrations.

**Table S2.** Target genes, oligonucleotide primers and expected product sizes in RT-PCRs

| <b>Gene</b> | <b>Accession No</b> | <b>Forward primer (5'-3')</b> | <b>Reverse primer (5'-3')</b> | <b>size (bp)</b> |
|-------------|---------------------|-------------------------------|-------------------------------|------------------|
| MDHAR1      | Csa3M775240*        | CCGGTTCCACTGTCATAAAATTG       | GATCATGGTAACATCAAGATCGTTG     | 212              |
| MDHAR2      | Csa6M451470*        | TATCCAAGGAGGCGGTTG            | CTCTTGGCAGGAAGATCTGC          | 202              |
| MDHAR3      | Csa3M099720*        | TGGAGTGGCAGCAGGATATG          | GAGGATCAATTCTATCCCTTTCTCTTC   | 235              |
| MDHAR4      | Csa5M524740*        | TGAAGCACAGTGCATGCC            | CCAACAACAACCATGTCAACA         | 192              |
| APX1        | CsaV3_6G047320      | GCAGATCTGTACCAGCTTGCTG        | CAGCAATTCCACAAAGTAGGAGTTATC   | 303              |
| APX2        | CsaV3_6G021870      | CTTCGTCTCGCATGGCA             | TGCCATTGAAGTTACTGGTGG         | 221              |
| APX4        | CsaV3_2G032090      | CGACACGAGAACTAGTTGCACTAT      | GAATGCTTGAGATGGATCAAAGAG      | 111              |
| APX5        | CsaV3_3G047650      | AACTCGCAGCACAAAGTGGC          | CGGACAGAACTGCCAGCTG           | 270              |
| GR1         | CsaV3_3G011090      | TACGATCTCTGGCCGACAAGAG        | CAGCACTGTTGGAATACACCCAT       | 182              |
| GR2         | CsaV3_7G027540      | CGTGGAAGATTCTGGATGAAC         | GCTCTAGAATTTGCTGGCATC         | 216              |
| GME2        | Csa2M011460.1*      | GTAAGAAGGTGTCCTGAGATTG        | TCTGAGTTACGACCACGG            | 173              |
| GGP         | Csa7M219200.1*      | TTTCTTCTCCCACAGTGTTATG        | TTCTTCGTCCCAGTCATT            | 360              |
| GalDH       | Csa7M067450.1*      | GTCTTGGCATCAACTTCTTC          | TGCTCCTTGTCACCCTCT            | 177              |
| GLDH        | CsaV3_UNG143090*    | GCCCTCCCAAATTCAAACC           | GGGCAAGTAGTTTATCGCG           | 153              |
| ACTIN       | CsaV3_2G018090*     | TCGTGCTTGACTCTGGTGATGG        | ACAACCACTGCCGAACGGGAAA        | 171              |

\*Primers are from Liu et al., 2019 [46], otherwise designed in this study.
